# Supplementary material for: Application of Gap Metric to LADRC Design in Multilinear Model of SDR
Source: Hindawi journal article supplement (doi:10.1155/2022/2669954), 2022-05-06
Supplement: f1 [file 2669954.f1.docx]

**Part A**

The following assumptions need to be made in the process of establishing the mathematical model of the gas generator: the solid grain is burnt on the end face, and the end face area remains unchanged; the gas parameters in the gas generator are equal everywhere; the gas is suitable for ideal gas state equation; the gas temperature in the gas generator remains unchanged; the burning rate of the burning surface of the grain is equal everywhere, and the burning rate conforms to the equation (S1).

|  | (S1) |
| --- | --- |

The mathematical model of the gas generator (GG) can be described by equation (S2) - (S4). They represent the gas flow rate generated by burning solid propellant, the gas flow rate being discharged through the throat, and the mass conservation equation of Gas Generator.

|  | (S2) |
| --- | --- |
|  | (S3) |
|  | (S4) |

Where , , is the gas flow rate generated by burning solid propellant, is gas density in the gas generator, is initial free-volume. Other variables have the same meaning as in the text.

Then the mass conservation equation at a certain moment can be described as equation (S5) and because of , equation (S5) can be simplified to equation (S6). We can use Taylor's formula to linearize equation (S6) at a certain characteristic point to obtain the transfer function from pressure to throat area, so we can get the equation (S7-S8). The subscript "0" indicates the small disturbance equilibrium state, and the prescript "" indicates the magnitude of change relative to the equilibrium state.

| , | (S5) |
| --- | --- |
| , | (S6) |
| , | (S7) |
| , | (S8) |

If the transfer function from to is represented by , then we can get an equation like (S9), which is used to describe the transfer function from to . And we can also get an equation like (S10) to describe the transfer function from to .

| , | (S9) |
| --- | --- |
| , | (S10) |

**Part B**

We can describe the first-order controlled system as the form of equation (S11)

| , | (S11) |
| --- | --- |

In the equation (S11), and are output and input respectively, represents the disturbance, it and are both unknown, part of is known, and the known part is denoted as , then equation (S11) can be written as:

| , | (S12) |
| --- | --- |

Among them, , is the total disturbance including internal disturbance and external disturbance.

We can select state variables: , , so, , it is an expanded state that includes disturbances. Convert the equation (S12) into a continuous extended state space description:

| , | (S13) |
| --- | --- |

Where, ，，, .

Since is unknown and can be estimated by the correction term, it is omitted. Then the continuous linear extended state observer corresponding to equation (S14) is:

| , | (S14) |
| --- | --- |

The equation (S14) can be further written in the form of equation (S15)

| , | (S15) |
| --- | --- |

Where , it is the combined input of LESO, and is the output of LESO.

Let us suppose, , then the discrete form of the LESO is:

| , | (S16) |
| --- | --- |

Put the pole of the LESO characteristic equation on ( is the bandwidth of the LESO), then:

| , | (S17) |
| --- | --- |

Solving equation (S17), we can get, ,

Finally, the output of the controller is:

| , | (S18) |
| --- | --- |

Where

Because of , we can get formula (S19), which is the closed-loop transfer function of the system. We can make , is the controller bandwidth.

| , | (S19) |
| --- | --- |

**Part C**

For LESO，

Then the transfer function of LESO can be expressed as：

(S20)

Since,

,,

So,

(S21)

We can get equation (S23) by combining equation (S21) and equation (S22)：

(S22)

Then,

(S23)

Finally, we can get the equivalent structure shown in Figure 7 according to equation (S23).

**Part D**

Table S1: Each pressure response index of the system under the M-LADRC with internal disturbance.

| () | Overshoot  () | Disturbance at position 1 () | Disturbance at position 2 () | Rise Time  () | Steady-state error  () |
| --- | --- | --- | --- | --- | --- |
| 0.6 | 0.0051 | 0.1706 | 0.0314 | 4.59 | 0.0023 |
| 0.7 | 0.0094 | 0.1378 | 0.0303 | 3.8 | 0.0032 |
| 0.8 | 0.014 | 0.1394 | 0.0312 | 3.77 | 0.0043 |
| 0.9 | 0.017 | 0.1875 | 0.0592 | 3.37 | 0.005 |
| 1 | 0.0198 | 0.2389 | 0.0551 | 2.91 | 0.0055 |
| 1.1 | 0.0227 | 0.2628 | 0.0479 | 2.64 | 0.0036 |
| 1.2 | 0.0265 | 0.2149 | 0.0331 | 2.6 | 0.0041 |
| 1.3 | 0.0305 | 0.1851 | 0.0333 | 2.78 | 0.0047 |
| 1.4 | 0.0347 | 0.1884 | 0.0308 | 2.87 | 0.0053 |
| 1.5 | 0.0391 | 0.1928 | 0.0285 | 2.93 | 0.0058 |
| 1.6 | 0.0438 | 0.1943 | 0.0253 | 2.99 | 0.0064 |
| 1.7 | 0.0485 | 0.1969 | 0.0239 | 3.07 | 0.0059 |
| 1.8 | 0.0528 | 0.2125 | 0.0248 | 3.14 | 0.005 |
| 1.9 | 0.0571 | 0.2257 | 0.0214 | 3.02 | 0.0054 |
| 2 | 0.0618 | 0.2234 | 0.0174 | 2.96 | 0.0057 |
| 2.1 | 0.0671 | 0.2082 | 0.017 | 2.93 | 0.0061 |
| 2.2 | 0.0726 | 0.2022 | 0.0148 | 3.04 | 0.0066 |
| 2.3 | 0.0772 | 0.2131 | 0.0146 | 3.13 | 0.007 |
| 2.4 | 0.0806 | 0.2448 | 0.0156 | 3.21 | 0.0072 |
| 2.5 | 0.084 | 0.2739 | 0.0132 | 3.04 | 0.0075 |

Table S2: Each pressure response index of the system under the GM-LADRC with internal disturbance.

| () | Overshoot  () | Disturbance at position 1 () | Disturbance at position 2 () | Rise Time  () | Steady-state error  () |
| --- | --- | --- | --- | --- | --- |
| 0.6 | 0 | 0.1685 | 0.0436 | 5.19 | 0.0002 |
| 0.7 | 0 | 0.1594 | 0.0453 | 3.78 | 0.0003 |
| 0.8 | 0 | 0.1603 | 0.0434 | 3.23 | 0.0004 |
| 0.9 | 0 | 0.1576 | 0.0446 | 2.96 | 0.0005 |
| 1 | 0 | 0.1606 | 0.0466 | 2.78 | 0.0004 |
| 1.1 | 0 | 0.1624 | 0.0451 | 2.66 | 0.0005 |
| 1.2 | 0 | 0.165 | 0.0435 | 2.57 | 0.0006 |
| 1.3 | 0 | 0.172 | 0.0436 | 2.5 | 0.0007 |
| 1.4 | 0 | 0.1791 | 0.042 | 2.46 | 0.0007 |
| 1.5 | 0 | 0.1859 | 0.0404 | 2.42 | 0.0008 |
| 1.6 | 0 | 0.1839 | 0.0357 | 2.41 | 0.0007 |
| 1.7 | 0 | 0.1836 | 0.0344 | 2.42 | 0.0008 |
| 1.8 | 0 | 0.1875 | 0.0338 | 2.42 | 0.0009 |
| 1.9 | 0 | 0.2023 | 0.036 | 2.42 | 0.001 |
| 2 | 0 | 0.2165 | 0.0336 | 2.37 | 0.0011 |
| 2.1 | 0 | 0.2206 | 0.0318 | 2.34 | 0.0011 |
| 2.2 | 0 | 0.2229 | 0.0296 | 2.33 | 0.0012 |
| 2.3 | 0 | 0.2227 | 0.0276 | 2.31 | 0.0013 |
| 2.4 | 0 | 0.2232 | 0.0255 | 2.31 | 0.0014 |
| 2.5 | 0 | 0.2246 | 0.0239 | 2.31 | 0.0015 |

Table S3: Each pressure response index of the system under the Adaptive-PI with internal disturbance.

| () | Overshoot  () | Disturbance at position 1 () | Disturbance at position 2 () | Rise Time  () | Steady-state error  () |
| --- | --- | --- | --- | --- | --- |
| 0.6 | 0 | 0.2354 | 0.0878 | 5.43 | 0 |
| 0.7 | 0 | 0.2473 | 0.0878 | 4.74 | 0 |
| 0.8 | 0 | 0.259 | 0.0867 | 4.28 | 0 |
| 0.9 | 0 | 0.2698 | 0.091 | 3.94 | 0 |
| 1 | 0 | 0.2812 | 0.0915 | 3.66 | 0 |
| 1.1 | 0 | 0.2917 | 0.0908 | 3.46 | 0 |
| 1.2 | 0 | 0.3012 | 0.0885 | 3.28 | 0 |
| 1.3 | 0 | 0.3139 | 0.0878 | 3.11 | 0 |
| 1.4 | 0 | 0.3296 | 0.0858 | 2.99 | 0 |
| 1.5 | 0 | 0.3478 | 0.084 | 2.88 | 0 |
| 1.6 | 0 | 0.361 | 0.0802 | 2.81 | 0 |
| 1.7 | 0 | 0.3733 | 0.0768 | 2.77 | 0 |
| 1.8 | 0 | 0.3856 | 0.0761 | 2.75 | 0 |
| 1.9 | 0 | 0.3975 | 0.072 | 2.73 | 0 |
| 2 | 0 | 0.4111 | 0.0674 | 2.71 | 0 |
| 2.1 | 0 | 0.4245 | 0.0643 | 2.68 | 0 |
| 2.2 | 0 | 0.4355 | 0.0596 | 2.65 | 0 |
| 2.3 | 0 | 0.4446 | 0.0563 | 2.62 | 0 |
| 2.4 | 0 | 0.4518 | 0.0516 | 2.6 | 0 |
| 2.5 | 0 | 0.4576 | 0.0482 | 2.57 | 0 |

Table S4: Each pressure response index of the system under the M-LADRC with external disturbance.

| () | Overshoot  () | Disturbance at position 1 () | Disturbance at position 2 () | Rise Time  () | Steady-state error  () |
| --- | --- | --- | --- | --- | --- |
| 0.6 | 0.0095 | 0.0951 | 0.0663 | 2.89 | 0.002 |
| 0.7 | 0.0147 | 0.1002 | 0.072 | 3.21 | 0.0029 |
| 0.8 | 0.0202 | 0.2044 | 0.0771 | 3.55 | 0.004 |
| 0.9 | 0.023 | 0.1981 | 0.1243 | 3.1 | 0.0046 |
| 1 | 0.0261 | 0.1706 | 0.1311 | 2.63 | 0.0051 |
| 1.1 | 0.0294 | 0.1388 | 0.1207 | 2.39 | 0.0034 |
| 1.2 | 0.0339 | 0.1384 | 0.0903 | 2.42 | 0.0039 |
| 1.3 | 0.0387 | 0.1383 | 0.0902 | 2.76 | 0.0044 |
| 1.4 | 0.0438 | 0.1394 | 0.0877 | 2.94 | 0.005 |
| 1.5 | 0.0491 | 0.1402 | 0.086 | 3.07 | 0.0056 |
| 1.6 | 0.0547 | 0.147 | 0.0837 | 3.17 | 0.0062 |
| 1.7 | 0.0601 | 0.1619 | 0.0828 | 3.26 | 0.0055 |
| 1.8 | 0.065 | 0.1604 | 0.0905 | 3.32 | 0.0048 |
| 1.9 | 0.07 | 0.1547 | 0.0867 | 3.16 | 0.0052 |
| 2 | 0.0754 | 0.1453 | 0.0831 | 3.09 | 0.0056 |
| 2.1 | 0.0815 | 0.1449 | 0.0782 | 3.05 | 0.006 |
| 2.2 | 0.0877 | 0.1494 | 0.0764 | 3.18 | 0.0064 |
| 2.3 | 0.0926 | 0.1731 | 0.076 | 3.28 | 0.0069 |
| 2.4 | 0.0963 | 0.1693 | 0.0919 | 3.36 | 0.0071 |
| 2.5 | 0.1001 | 0.1554 | 0.0882 | 3.17 | 0.0074 |

Table S5: Each pressure response index of the system under the GM-LADRC with external disturbance.

| () | Overshoot  () | Disturbance at position 1 () | Disturbance at position 2 () | Rise Time  () | Steady-state error  () |
| --- | --- | --- | --- | --- | --- |
| 0.6 | 0 | 0.1012 | 0.0814 | 2.98 | 0.0002 |
| 0.7 | 0 | 0.1057 | 0.094 | 2.8 | 0.0003 |
| 0.8 | 0 | 0.1067 | 0.0987 | 2.69 | 0.0003 |
| 0.9 | 0 | 0.1092 | 0.1022 | 2.61 | 0.0004 |
| 1 | 0 | 0.1084 | 0.1057 | 2.57 | 0.0004 |
| 1.1 | 0 | 0.109 | 0.1042 | 2.53 | 0.0005 |
| 1.2 | 0 | 0.1112 | 0.1038 | 2.51 | 0.0005 |
| 1.3 | 0 | 0.1102 | 0.1066 | 2.48 | 0.0006 |
| 1.4 | 0 | 0.1098 | 0.106 | 2.45 | 0.0007 |
| 1.5 | 0 | 0.1036 | 0.1055 | 2.44 | 0.0008 |
| 1.6 | 0 | 0.1042 | 0.0992 | 2.43 | 0.0007 |
| 1.7 | 0 | 0.1037 | 0.0999 | 2.45 | 0.0008 |
| 1.8 | 0 | 0.1158 | 0.1006 | 2.45 | 0.0009 |
| 1.9 | 0 | 0.1161 | 0.1115 | 2.45 | 0.001 |
| 2 | 0 | 0.1153 | 0.1116 | 2.4 | 0.001 |
| 2.1 | 0 | 0.1136 | 0.1113 | 2.36 | 0.0011 |
| 2.2 | 0 | 0.1108 | 0.1104 | 2.34 | 0.0012 |
| 2.3 | 0 | 0.1098 | 0.108 | 2.33 | 0.0013 |
| 2.4 | 0 | 0.1084 | 0.1068 | 2.33 | 0.0014 |
| 2.5 | 0 | 0.1069 | 0.1058 | 2.33 | 0.0015 |

Table S6: Each pressure response index of the system under the Adaptive-PI with external disturbance.

| () | Overshoot  () | Disturbance at position 1 () | Disturbance at position 2 () | Rise Time  () | Steady-state error  () |
| --- | --- | --- | --- | --- | --- |
| 0.6 | 0 | 0.1884 | 0.1396 | 4.15 | 0 |
| 0.7 | 0 | 0.2041 | 0.1595 | 3.74 | 0 |
| 0.8 | 0 | 0.2102 | 0.177 | 3.48 | 0 |
| 0.9 | 0 | 0.2106 | 0.1919 | 3.24 | 0 |
| 1 | 0 | 0.2154 | 0.1983 | 3.14 | 0 |
| 1.1 | 0 | 0.2201 | 0.1972 | 3.06 | 0 |
| 1.2 | 0 | 0.2237 | 0.1988 | 3 | 0 |
| 1.3 | 0 | 0.2267 | 0.2027 | 2.91 | 0 |
| 1.4 | 0 | 0.232 | 0.2057 | 2.85 | 0 |
| 1.5 | 0 | 0.238 | 0.2074 | 2.8 | 0 |
| 1.6 | 0 | 0.2428 | 0.2091 | 2.76 | 0 |
| 1.7 | 0 | 0.2453 | 0.2125 | 2.72 | 0 |
| 1.8 | 0 | 0.2458 | 0.2162 | 2.67 | 0 |
| 1.9 | 0 | 0.2474 | 0.2171 | 2.65 | 0 |
| 2 | 0 | 0.2473 | 0.2179 | 2.63 | 0 |
| 2.1 | 0 | 0.245 | 0.2197 | 2.6 | 0 |
| 2.2 | 0 | 0.2439 | 0.2195 | 2.56 | 0 |
| 2.3 | 0 | 0.2413 | 0.2189 | 2.54 | 0 |
| 2.4 | 0 | 0.2395 | 0.2171 | 2.51 | 0 |
| 2.5 | 0 | 0.2364 | 0.2152 | 2.48 | 0 |
